# Supplementary material
Source: PubMed Central journal article supplement (PMC3859804)
Supplement: NIHMS519561-supplement-1.pdf [file NIHMS519561-supplement-1.pdf]

**Supporting Information**

**for**

**Characterization of Bleomycin Mediated Cleavage of a  
Hairpin DNA Library**

Zachary J. Segerman, Basab Roy, and Sidney M. Hecht

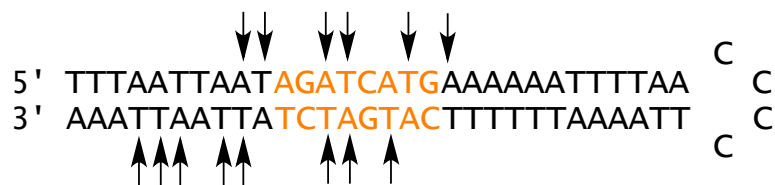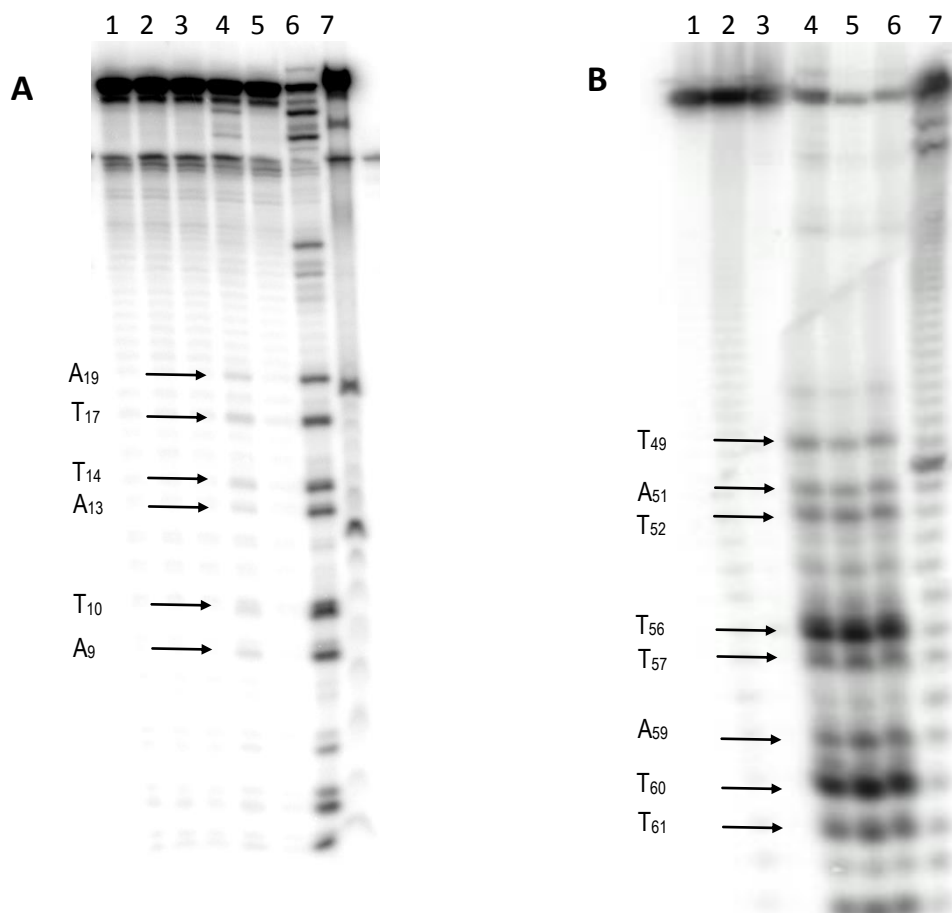

**Figure S1.** A) Sequence-selective cleavage of [5'-<sup>32</sup>P]-end labeled 64-nt hairpin DNA **1** by BLM A<sub>5</sub>. Lane 1, radiolabeled **1** alone; lane 2, 20 μM Fe<sup>2+</sup>; lane 3, 5 μM BLM A<sub>5</sub>; lane 4, 5 μM Fe(II)•BLM A<sub>5</sub>; lane 5, 20 μM BLM A<sub>5</sub>; lane 6, 20 μM Fe(II)•BLM A<sub>5</sub>; lane 7, G lane. B) Sequence-selective cleavage of [3'-<sup>32</sup>P] end labeled 64-nt hairpin DNA **1** by BLM A<sub>5</sub>. Lane 1, radiolabeled **1** alone; lane 2, 10 μM Fe<sup>2+</sup>; lane 3, 10 μM BLM A<sub>5</sub>; lane 4, 1 μM Fe(II)•BLM A<sub>5</sub>; lane 5, 5 μM Fe(II)•BLM A<sub>5</sub>; lane 6, 10 μM Fe(II)•BLM A<sub>5</sub>; lane 7, G lane.

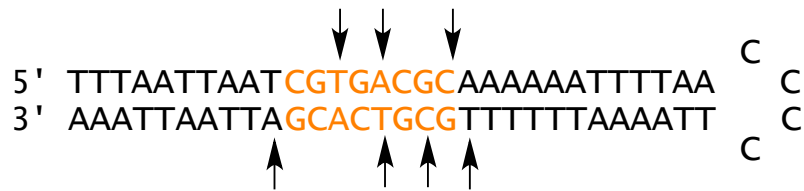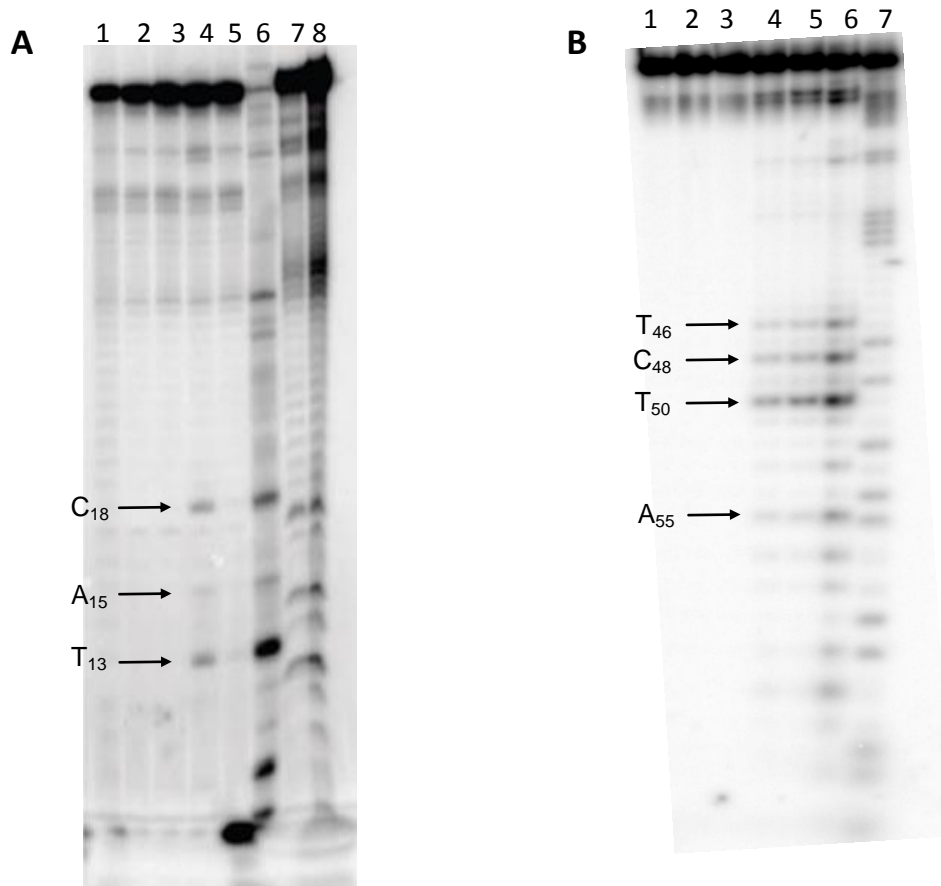

**Figure S2.** A) Sequence-selective cleavage of [5'-<sup>32</sup>P]-end labeled 64-nt hairpin DNA **2** by BLM A<sub>5</sub>. Lane 1, radiolabeled **2** alone; lane 2, 20 μM Fe<sup>2+</sup>; lane 3, 5 μM BLM A<sub>5</sub>; lane 4, 5 μM Fe(II)•BLM A<sub>5</sub>; lane 5, 20 μM BLM A<sub>5</sub>; lane 6, 20 μM Fe(II)•BLM A<sub>5</sub>; lane 7, G+A lane; lane 8, G lane. B) Sequence-selective cleavage of [3'-<sup>32</sup>P]-end labeled 64-nt hairpin DNA **2** by BLM A<sub>5</sub>. Lane 1, radiolabeled **2** alone; lane 2, 10 μM Fe<sup>2+</sup>; lane 3, 10 μM BLM A<sub>5</sub>; lane 4, 1 μM Fe(II)•BLM A<sub>5</sub>; lane 5, 5 μM Fe(II)•BLM A<sub>5</sub>; lane 6, 10 μM Fe(II)•BLM A<sub>5</sub>; lane 7, G+A lane.

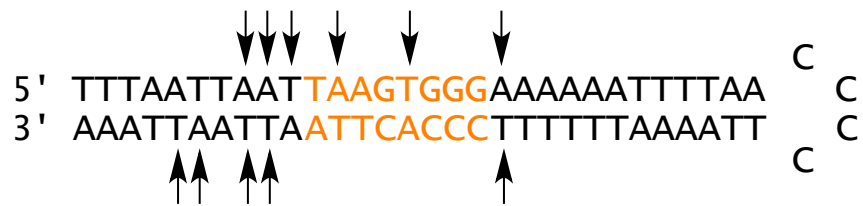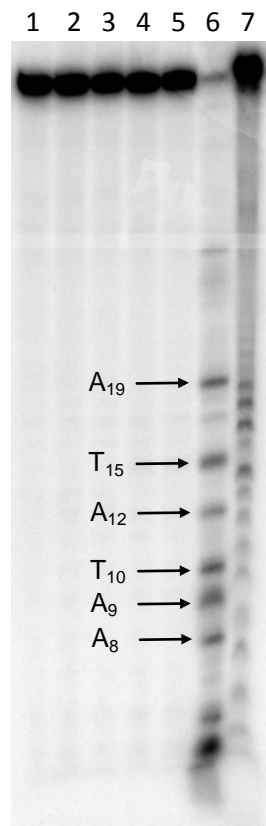

**Figure S3.** Sequence-selective cleavage of [5'-<sup>32</sup>P]-end labeled 64-nt hairpin DNA **3** by BLM A<sub>5</sub>. Lane 1, radiolabeled **3** alone; lane 2, 20 μM Fe<sup>2+</sup>; lane 3, 5 μM BLM A<sub>5</sub>; lane 4, 5 μM Fe(II)•BLM A<sub>5</sub>; lane 5, 20 μM BLM A<sub>5</sub>; lane 6, 20 μM Fe(II)•BLM A<sub>5</sub>; lane 7, G lane.

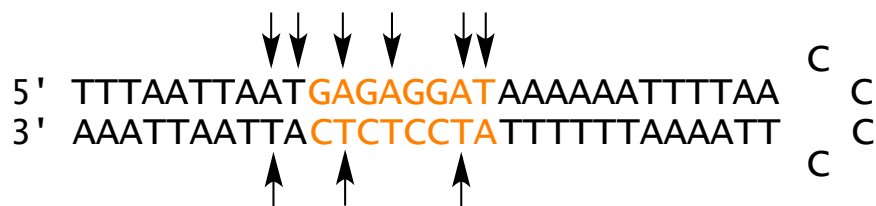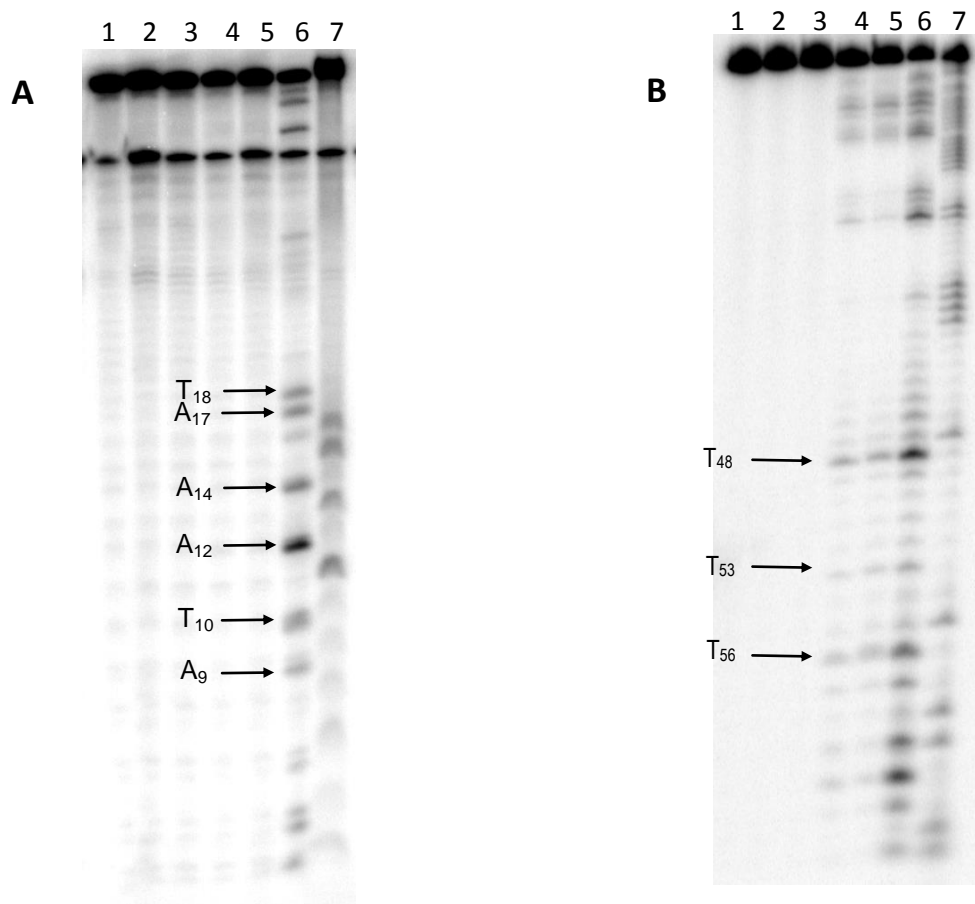

**Figure S4.** A) Sequence-selective cleavage of [5'-<sup>32</sup>P]-end labeled 64-nt hairpin DNA **4** by BLM A<sub>5</sub>. Lane 1, radiolabeled **4** alone; lane 2, 20 μM Fe<sup>2+</sup>; lane 3, 5 μM BLM A<sub>5</sub>; lane 4, 5 μM Fe(II)•BLM A<sub>5</sub>; lane 5, 20 μM BLM A<sub>5</sub>; lane 6, 20 μM Fe(II)•BLM A<sub>5</sub>; lane 7, G lane. B) Sequence-selective cleavage of [3'-<sup>32</sup>P] end labeled 64-nt hairpin DNA **4** by BLM A<sub>5</sub>. Lane 1, radiolabeled **4** alone; lane 2, 10 μM Fe<sup>2+</sup>; lane 3, 5 μM BLM A<sub>5</sub>; lane 4, 1 μM Fe(II)•BLM A<sub>5</sub>; lane 5, 5 μM Fe(II)•BLM A<sub>5</sub>; lane 6, 10 μM Fe(II)•BLM A<sub>5</sub>; lane 7, G+A lane.

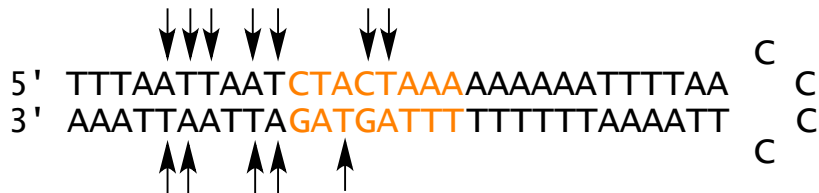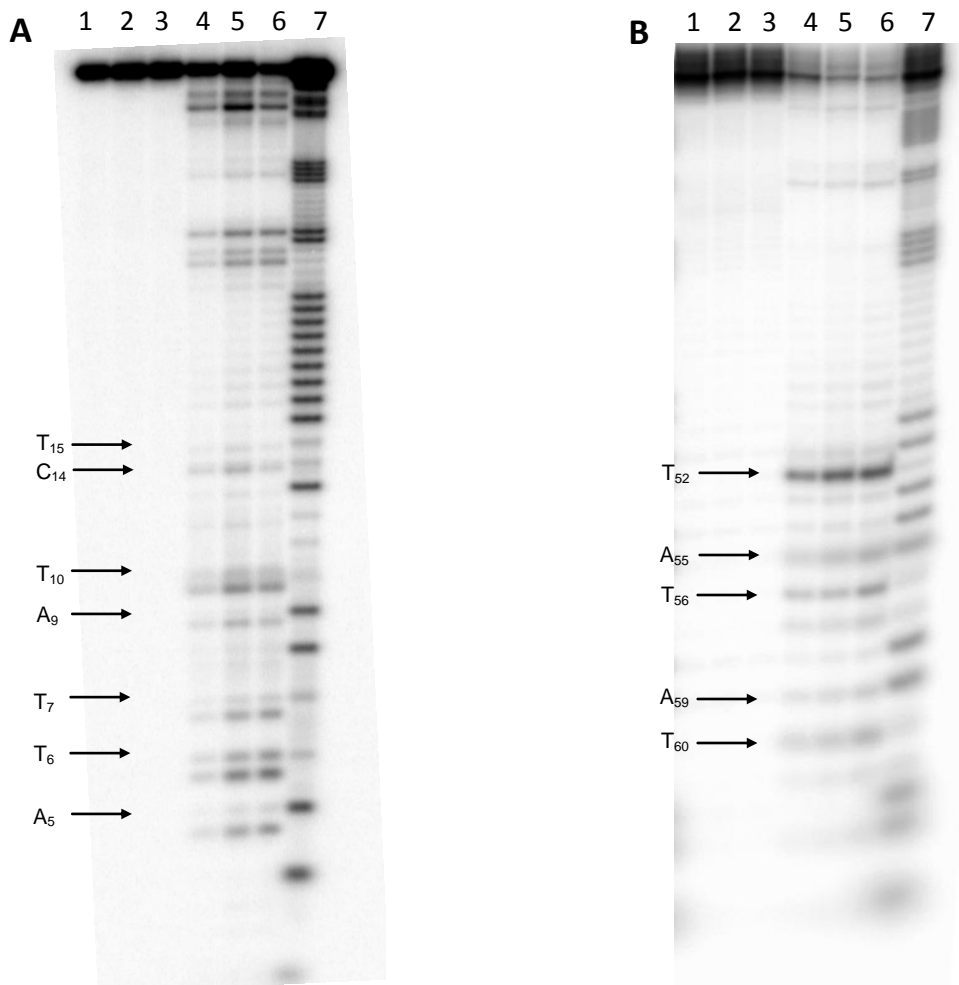

**Figure S5.** A) Sequence-selective cleavage of [5'-<sup>32</sup>P]-end labeled 64-nt hairpin DNA **6** by BLM A<sub>5</sub>. Lane 1, radiolabeled **6** alone; lane 2, 5 μM Fe<sup>2+</sup>; lane 3, 5 μM BLM A<sub>5</sub>; lane 4, 1 μM Fe(II)•BLM A<sub>5</sub>; lane 5, 2.5 μM Fe(II)•BLM A<sub>5</sub>; lane 6, 5 μM Fe(II)•BLM A<sub>5</sub>; lane 7, G+A lane. B) Sequence-selective cleavage of [3'-<sup>32</sup>P]-end labeled 64-nt hairpin DNA **6** by BLM A<sub>5</sub>. Lane 1, radiolabeled **6** alone; lane 2, 10 μM Fe<sup>2+</sup>; lane 3, 5 μM BLM A<sub>5</sub>; lane 4, 1 μM Fe(II)•BLM A<sub>5</sub>; lane 5, 2.5 μM Fe(II)•BLM A<sub>5</sub>; lane 6, 5 μM Fe(II)•BLM A<sub>5</sub>; lane 7, G+A lane.

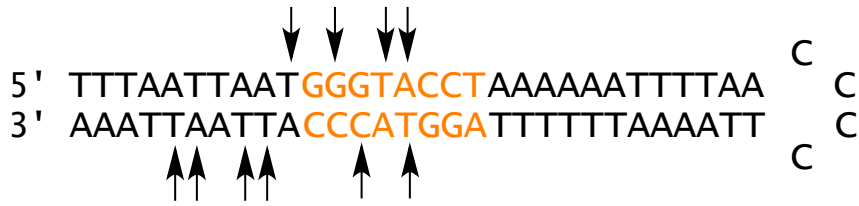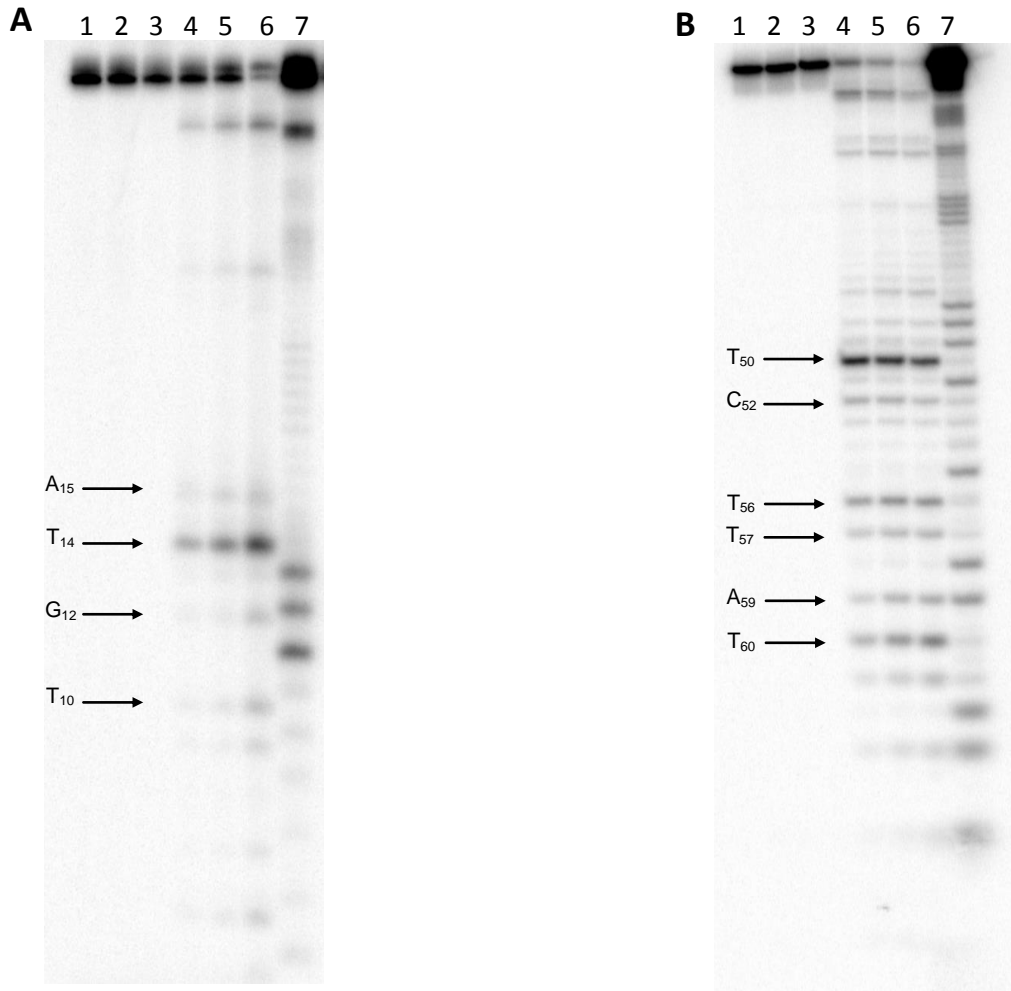

**Figure S6.** A) Sequence-selective cleavage of [5'-<sup>32</sup>P]-end labeled 64-nt hairpin DNA **8** by BLM A<sub>5</sub>. Lane 1, radiolabeled **8** alone; lane 2, 5 μM Fe<sup>2+</sup>; lane 3, 5 μM BLM A<sub>5</sub>; lane 4, 1 μM Fe(II)·BLM A<sub>5</sub>; lane 5, 2.5 μM Fe(II)·BLM A<sub>5</sub>; lane 6, 5 μM Fe(II)·BLM A<sub>5</sub>; lane 7, G lane. B) Sequence-selective cleavage of [3'-<sup>32</sup>P]-end labeled 64-nt hairpin DNA **8** by BLM A<sub>5</sub>. Lane 1, radiolabeled **8** alone; lane 2, 10 μM Fe<sup>2+</sup>; lane 3, 5 μM BLM A<sub>5</sub>; lane 4, 1 μM Fe(II)·BLM A<sub>5</sub>; lane 5, 2.5 μM Fe(II)·BLM A<sub>5</sub>; lane 6, 5 μM Fe(II)·BLM A<sub>5</sub>; lane 7, G+A lane.

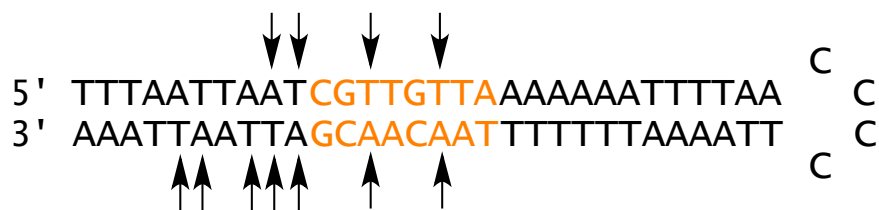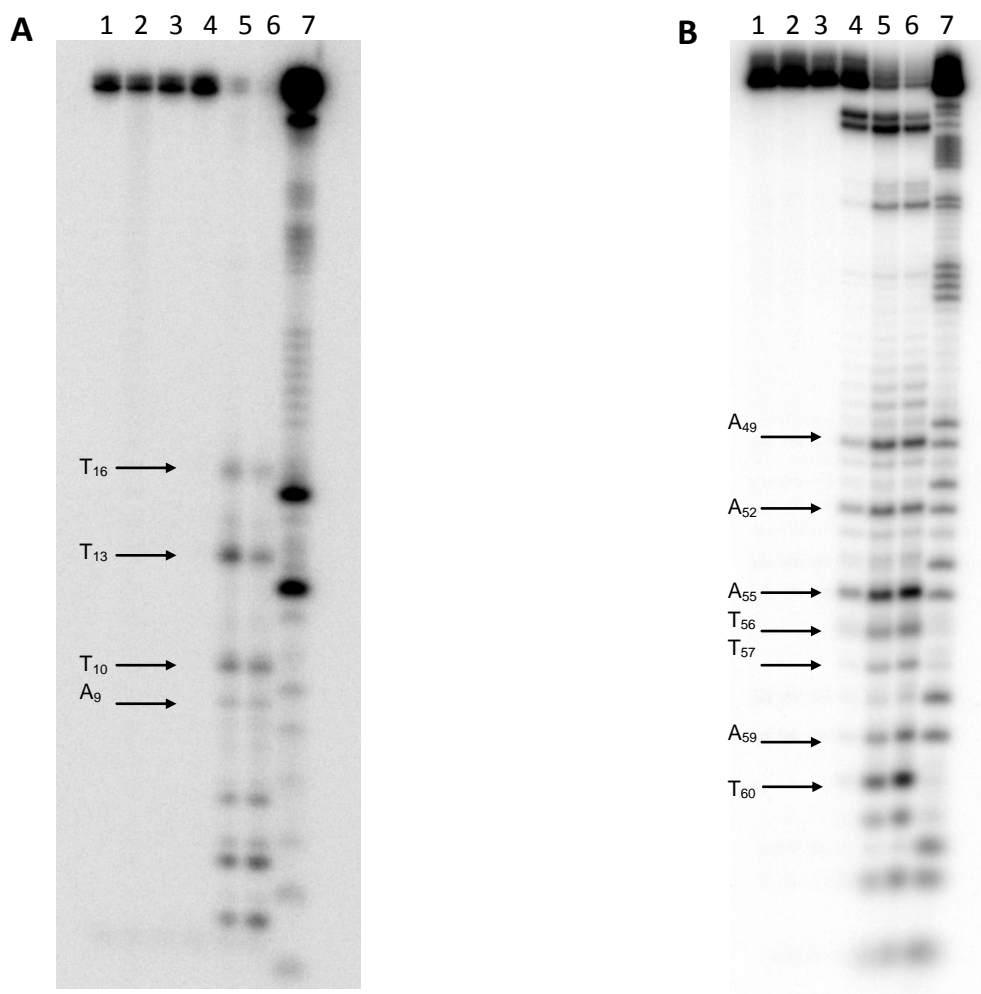

**Figure S7.** A) Sequence-selective cleavage of [5'-<sup>32</sup>P]-end labeled 64-nt hairpin DNA **9** by BLM A<sub>5</sub>. Lane 1, radiolabeled **9** alone; lane 2, 5 μM Fe<sup>2+</sup>; lane 3, 5 μM BLM A<sub>5</sub>; lane 4, 1 μM Fe(II)•BLM A<sub>5</sub>; lane 5, 2.5 μM Fe(II)•BLM A<sub>5</sub>; lane 6, 5 μM Fe(II)•BLM A<sub>5</sub>; lane 7, G lane. B) Sequence-selective cleavage of [3'-<sup>32</sup>P]-end labeled 64-nt hairpin DNA **9** by BLM A<sub>5</sub>. Lane 1, radiolabeled **9** alone; lane 2, 10 μM Fe<sup>2+</sup>; lane 3, 5 μM BLM A<sub>5</sub>; lane 4, 1 μM Fe(II)•BLM A<sub>5</sub>; lane 5, 2.5 μM Fe(II)•BLM A<sub>5</sub>; lane 6, 5 μM Fe(II)•BLM A<sub>5</sub>; lane 7, G+A lane.



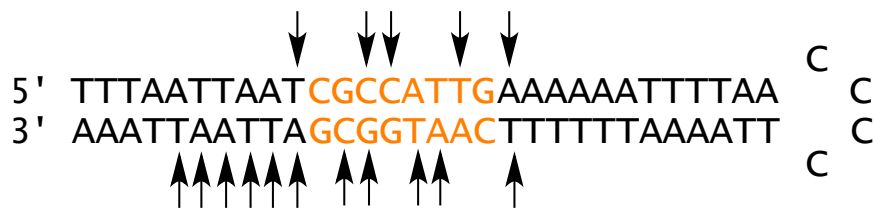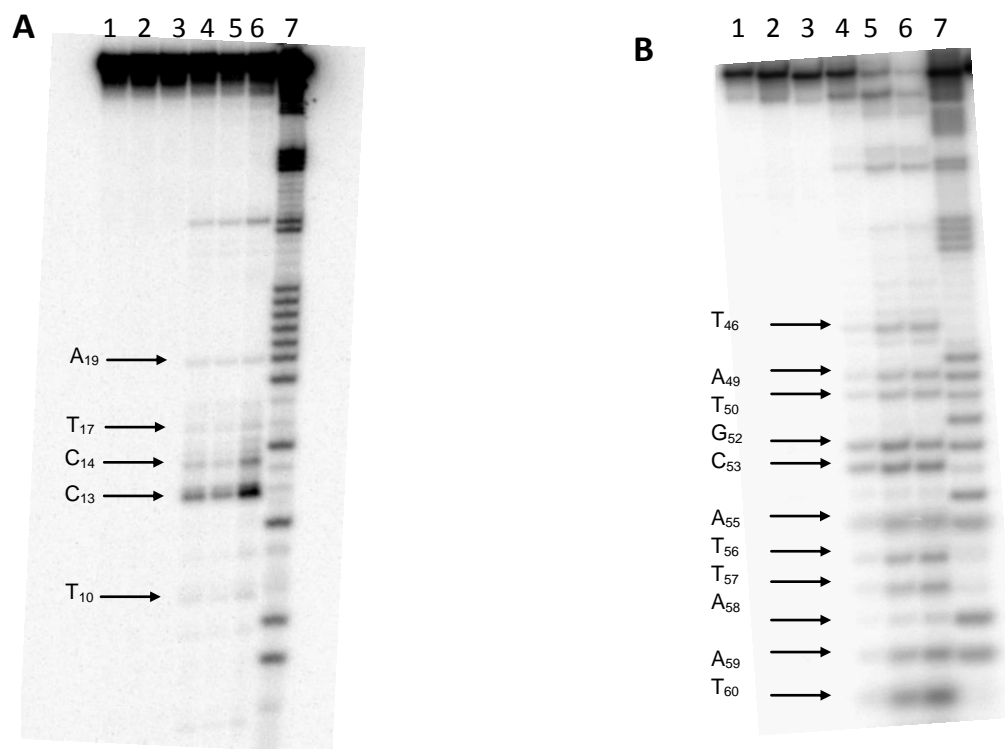

**Figure S8.** A) Sequence-selective cleavage of [5'-<sup>32</sup>P]-end labeled 64-nt hairpin DNA **10** by BLM A<sub>5</sub>. Lane 1, radiolabeled **10** alone; lane 2, 5 μM Fe<sup>2+</sup>; lane 3, 5 μM BLM A<sub>5</sub>; lane 4, 1 μM Fe(II)•BLM A<sub>5</sub>; lane 5, 2.5 μM Fe(II)•BLM A<sub>5</sub>; lane 6, 5 μM Fe(II)•BLM A<sub>5</sub>; lane 7, G lane. B) Sequence-selective cleavage of [3'-<sup>32</sup>P]-end labeled 64-nt hairpin DNA **10** by BLM A<sub>5</sub>. Lane 1, radiolabeled **10** alone; lane 2, 10 μM Fe<sup>2+</sup>; lane 3, 5 μM BLM A<sub>5</sub>; lane 4, 1 μM Fe(II)•BLM A<sub>5</sub>; lane 5, 2.5 μM Fe(II)•BLM A<sub>5</sub>; lane 6, 5 μM Fe(II)•BLM A<sub>5</sub>; lane 7, G+A lane.
